# Supplementary material
Source: PubMed Central journal article supplement (PMC8232017)
Supplement: NIHMS1716054-supplement-supinfo.pdf [file NIHMS1716054-supplement-supinfo.pdf]

## Supporting information

| SN | File Designation | File Description                                                                                                                    |
|----|------------------|-------------------------------------------------------------------------------------------------------------------------------------|
| 1  | Figure-S1        | Effect of delayed treatment with CTLA4-Ig plus Bortezomib on plasma cell subsets in mice immunized with donor spleen cells          |
| 2  | Figure-S2        | Kinetics of donor specific antibody responses post primary sensitization with (A) B/c spleen cells or (B) skin transplant           |
| 3  | Figure-S3        | Effect of delayed treatment with CTLA4-Ig plus Bortezomib on plasma cell subsets in mice immunized with 1° skin transplant          |
| 4  | Figure-S4        | Effect of delayed treatment with CTLA4-Ig plus bortezomib on plasma cell subsets in the spleen after 2° BALB/c skin transplantation |
| 5  | Figure-S5A       | Clinical sequelae for Case 2                                                                                                        |
| 6  | Figure-S5B       | Clinical sequelae for Case 3                                                                                                        |
| 7  | Figure-S5C       | Clinical sequelae for Case 4                                                                                                        |
| 8  | Figure-S5D       | Clinical sequelae for Case 5                                                                                                        |
| 9  | Figure-S5E       | Clinical sequelae for Case 6                                                                                                        |
| 10 | Figure-S6        | MFI of DSA is not predictive of time to undetectable                                                                                |
| 11 | Table-S1         | Characteristics for all biopsies of patients treated with Belatacept plus bortezomib (B/B)                                          |
| 12 | Table-S2         | cPRA and DSA for individual patients                                                                                                |
| 13 | Table-S3         | Changes in eGFR in AMR patients treated with Belatacept plus bortezomib                                                             |
| 14 | Method           | A description of materials, methods and statistical analysis.                                                                       |

**Fig S1: Effect of delayed treatment with CTLA4-Ig plus Bortezomib on plasma cell subsets in mice immunized with donor spleen cells**

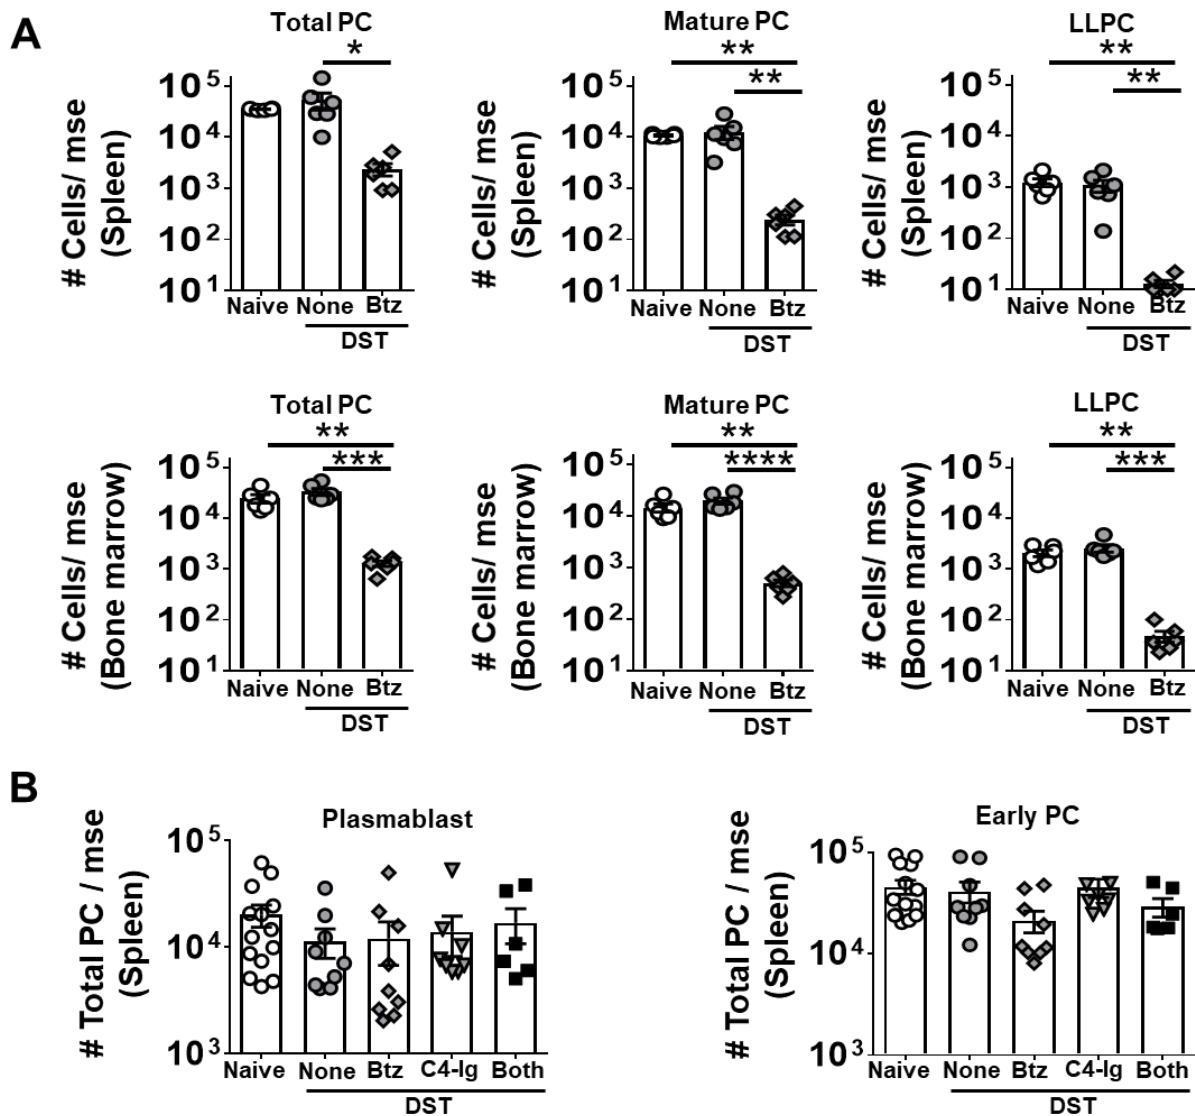

**Figure S1: Effect of delayed treatment with CTLA4-Ig plus Bortezomib on plasma cell subsets in mice immunized with donor spleen cells. (A)** Quantification of total PC, mature PC and long lived plasma cells (LLPCs: CD20-, CD19-, CD27-, CD38+, and CD138+) in spleen and bone marrow harvested from C57BL/6 mice immunized with BALB/c donor splenocytes (DST) and received no treatment (None) or Bortezomib (Btz; D5, D6). **(B)** Quantification of plasma cell subsets (plasmablast and early plasma cells (PC)) in spleens harvested from C57BL/6 mice immunized with BALB/c donor splenocytes (DST) and received no treatment (None), CTLA4-Ig (C4-Ig; from D5), Bortezomib (Btz; D5, D6) or CTLA4-Ig and Bortezomib (Both; from D5). (N=5-8/group). Y-axis represents total cells retrieved per mouse from naïve or mice immunized with DST, and each dot represents an individual mouse. Data are pooled from  $\geq 2$  independent experiments and presented as Mean  $\pm$  SEM, and statistically significant differences were assessed by one way ANOVA. (\* $P < 0.05$ ) (\*\* $P < 0.01$ ) (\*\*\*) $P < 0.001$ ) (\*\*\*\* $P < 0.0001$ ).

**Fig S2. Kinetics of donor specific antibody responses post primary sensitization with (A) B/c spleen cells or (B) skin transplant**

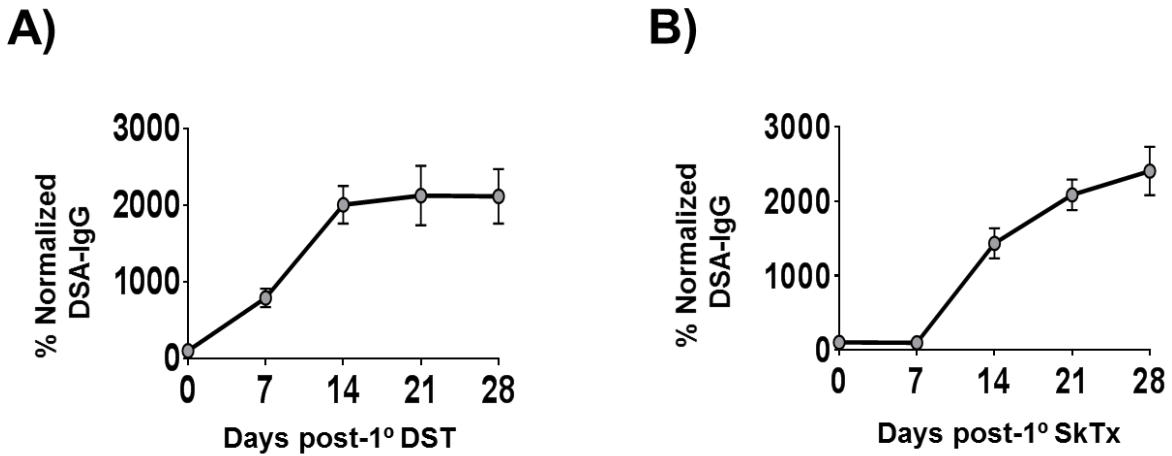

**Figure S2. Kinetics of donor specific antibody responses post primary sensitization with (A) B/c spleen cells or (B) skin transplant:** Anti-BALB/c IgG were assessed from D0-D28 post immunization with BALB/c (A) donor spleen cells (DST) (B) and skin allografts. (N=4-6/group). The Y-axis represents normalized MFI, calculated by considering the baseline MFI at day 0 to be 100% for each individual mouse. Data are presented as Mean  $\pm$  SEM.

**Fig S3: Effect of delayed treatment with CTLA4-Ig plus Bortezomib on plasma cell subsets in mice immunized with 1° skin transplant**

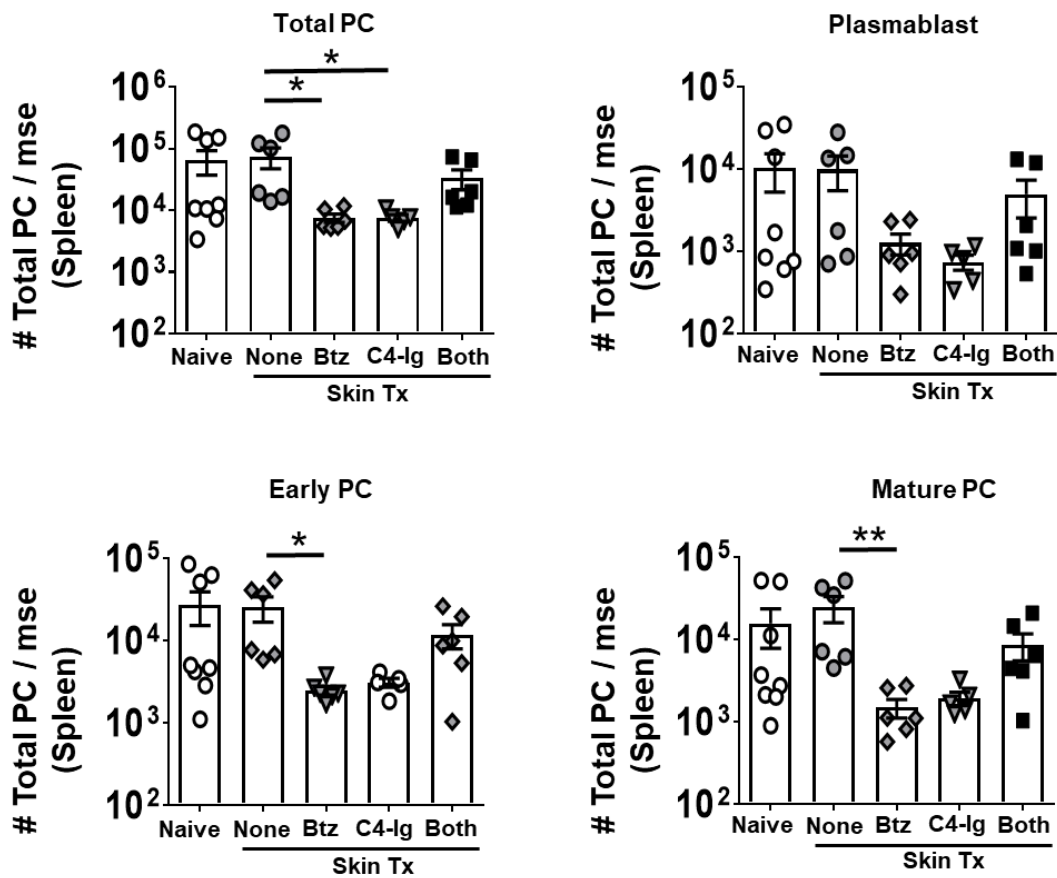

**Figure S3: Effect of delayed treatment with CTLA4-Ig plus Bortezomib on plasma cell subsets in mice immunized with 1° skin transplant** Quantification of plasma cell subsets in spleen harvested from C57BL/6 mice immunized with BALB/c skin allografts and received no treatment (None), CTLA4-Ig (C4-Ig; from D14), Bortezomib (Btz; D14, D15) or CTLA4-Ig and Bortezomib both (Both; from D14 or D35) (N=5-8/group). Y-axis represents total cells retrieved per mouse from naïve or mice immunized with DST or skin allograft, and each dot represents an individual mouse. Data are pooled from >2 independent experiments and presented as Mean ± SEM, and statistically significant differences were assessed by one way ANOVA. (\* $P < 0.05$ ) (\*\* $P < 0.01$ ) (\*\*\*) $P < 0.001$ ) (\*\*\*\* $P < 0.0001$ ).

**Fig S4. Effect of delayed treatment with CTLA4-Ig plus Bortezomib on plasma cell subsets in the spleen after 2° BALB/c skin transplantation**

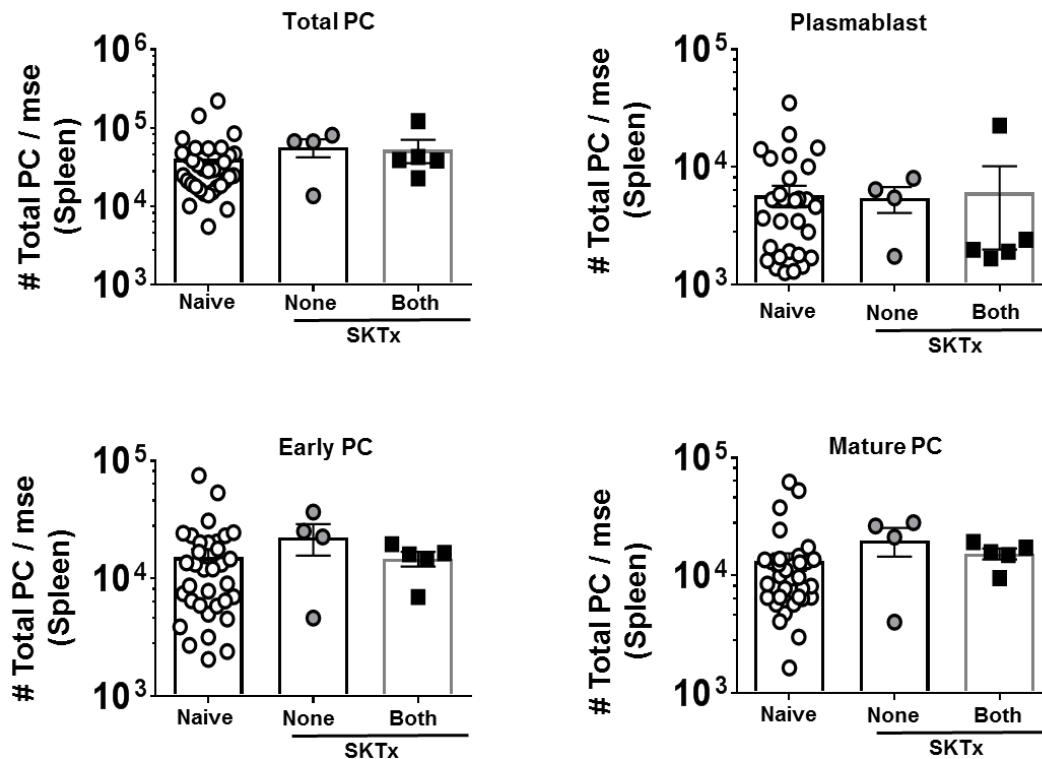

**Figure S4: Effect of delayed treatment with CTLA4-Ig plus Bortezomib on plasma cell subsets in the spleen after 2° BALB/c skin transplantation.** Quantification of plasma cell subsets in spleen harvested from naïve C57BL/6 or mice received BALB/c skin allograft on POD-70 and POD0. The Y-axis represents total cells retrieved per mouse on POD28. Cells retrieved from naïve or mice received 2° skin allograft, not receiving (None) or receiving CTLA4-Ig and Bortezomib from D14 post-2° skin transplant (Both; N=5-8/group). Each dot represents an individual mouse, pooled from >2 independent experiments. Data are presented as Mean  $\pm$  SEM and statistically significant differences were assessed by one way ANOVA. (\*P <0.05) (\*\*P <0.01) (\*\*\*)P <0.001) (\*\*\*\*P <0.0001).

**Fig S5-A: Clinical sequelae for Case 2**

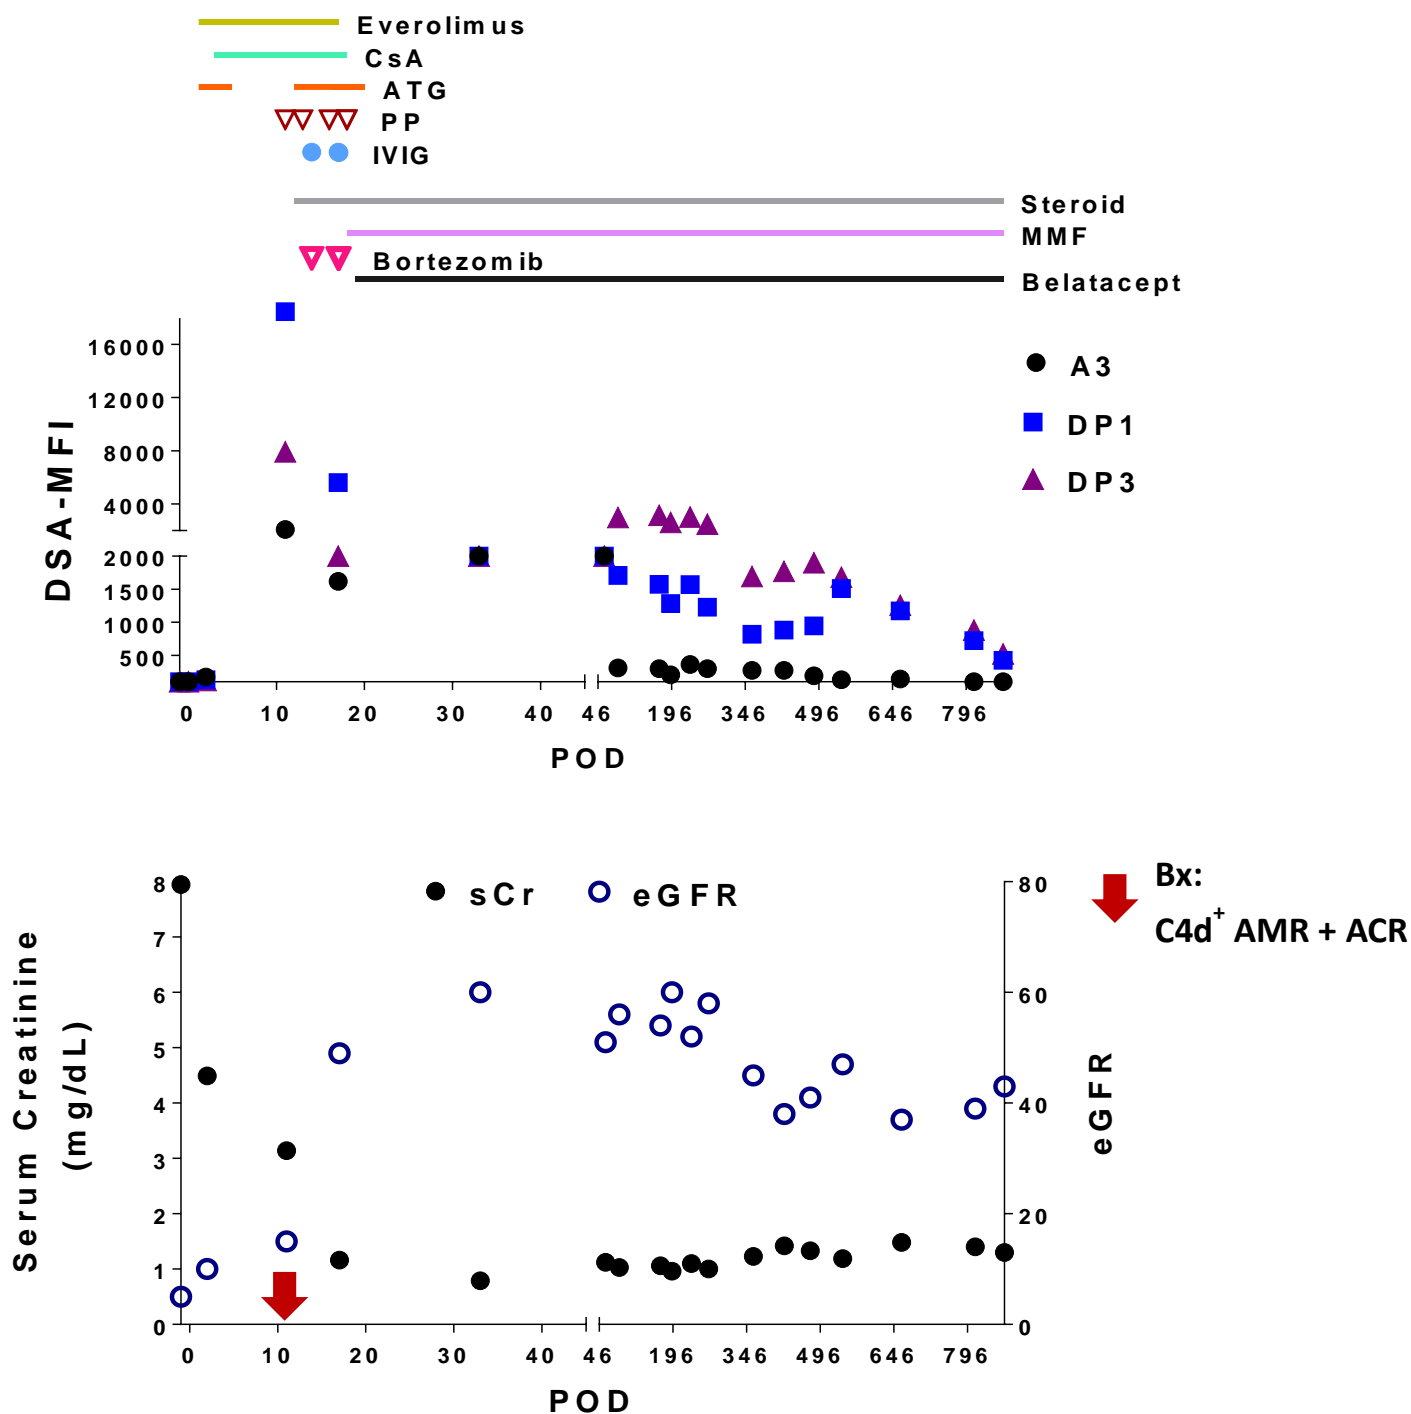

\*Values higher than 60 for eGFR were plotted as 60.

\*\*The MFI till POD59 were measured with SAB kit from Immucor Inc.

Fig S5-B: Clinical sequelae for Case 3

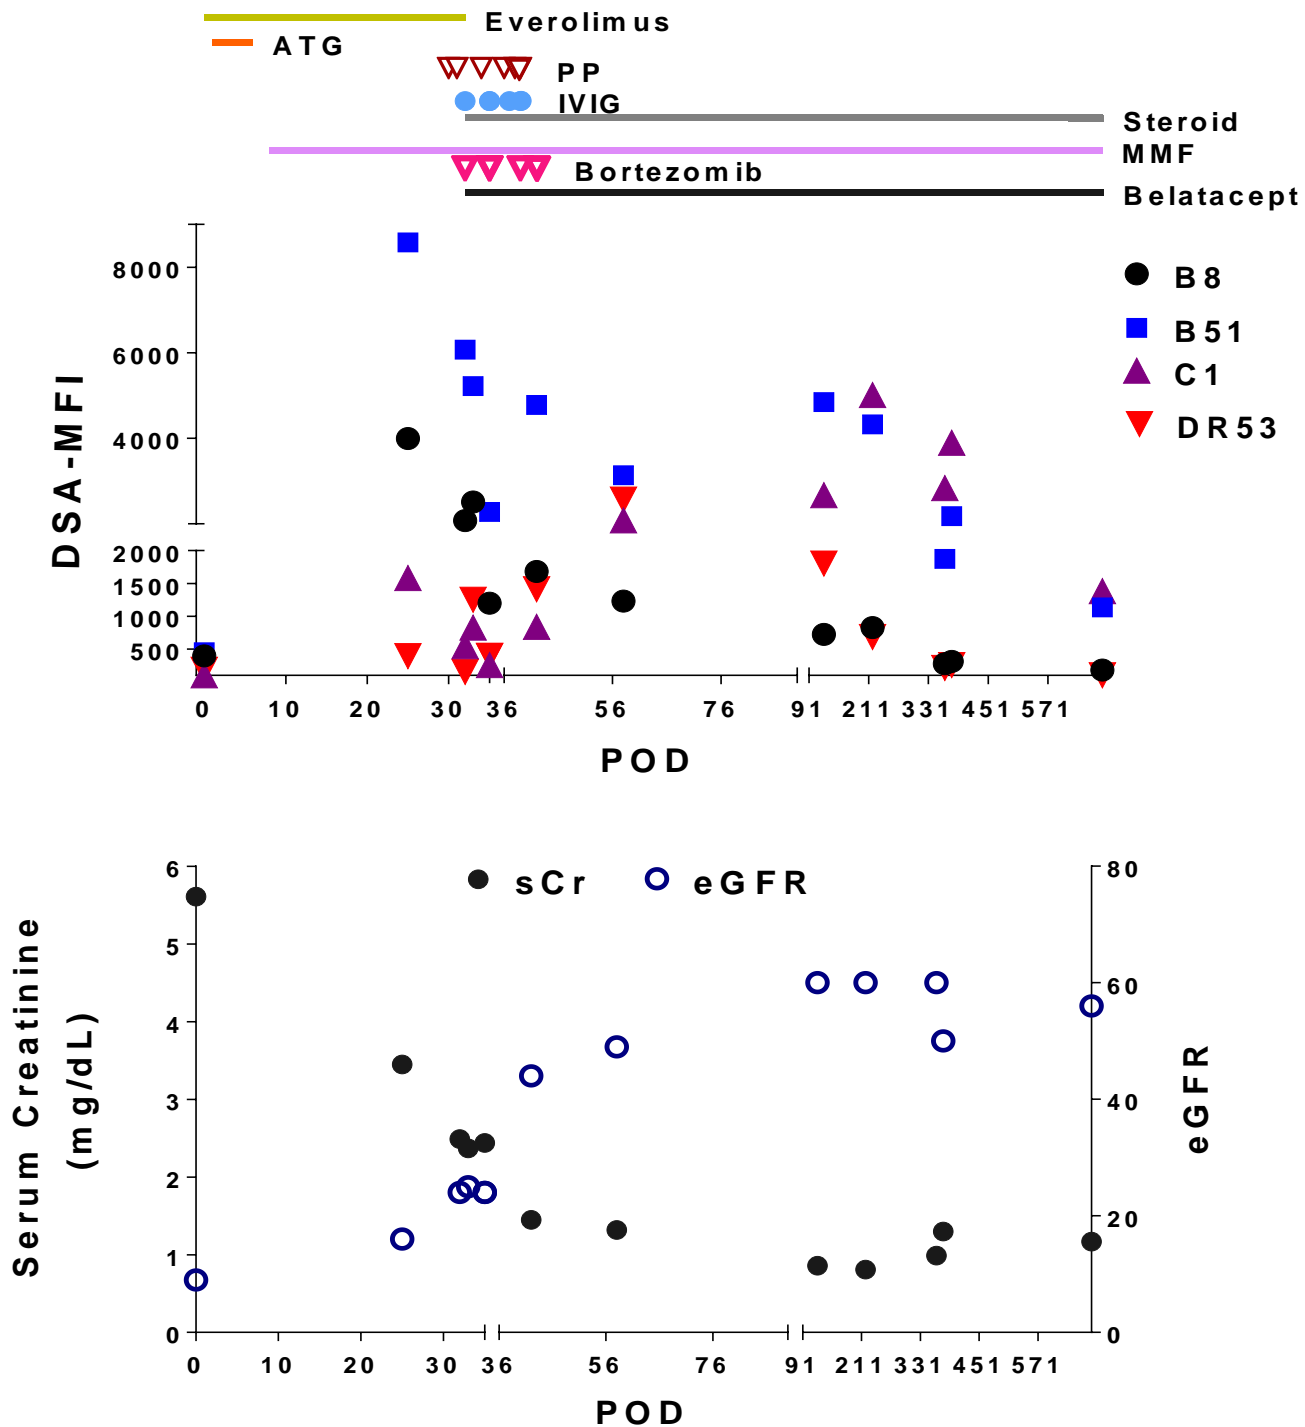

\*Values higher than 60 for eGFR were plotted as 60.

Fig S5-C: Clinical sequelae for Case 4

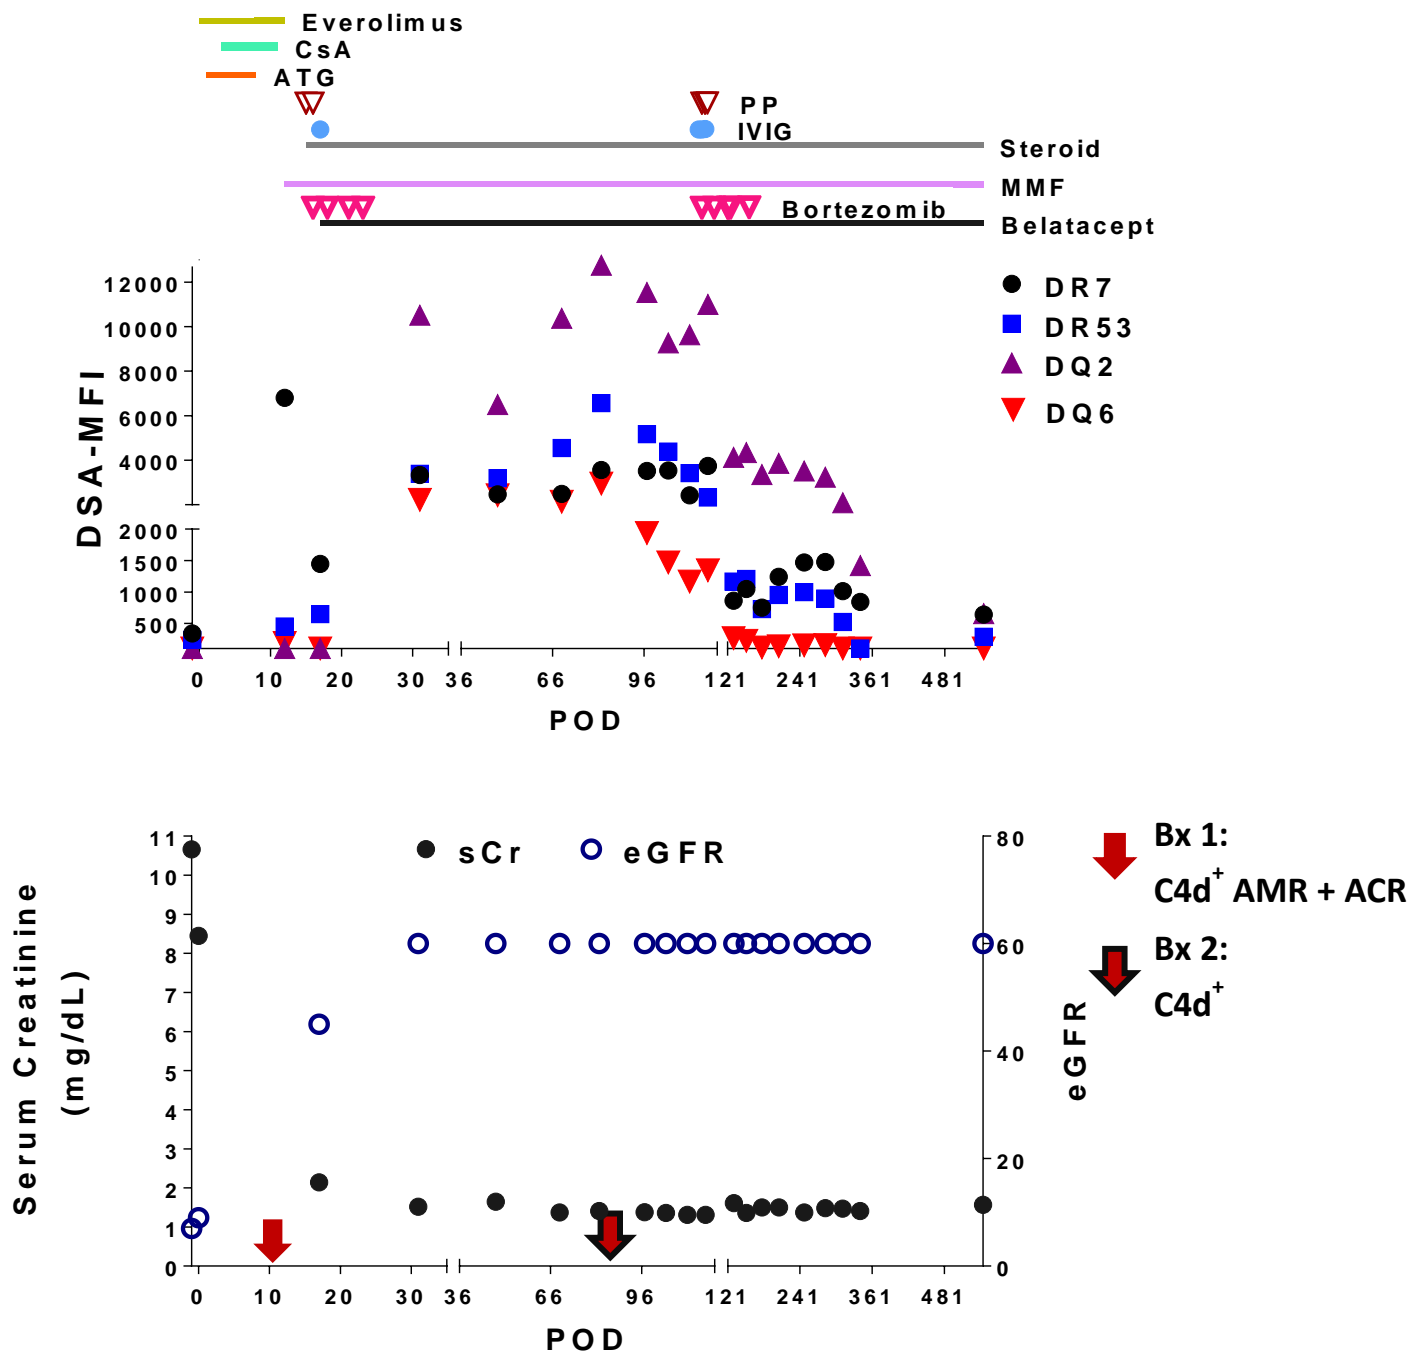

\*Values higher than 60 for eGFR were plotted as 60.



Fig S5-D: Clinical sequelae for Case 5

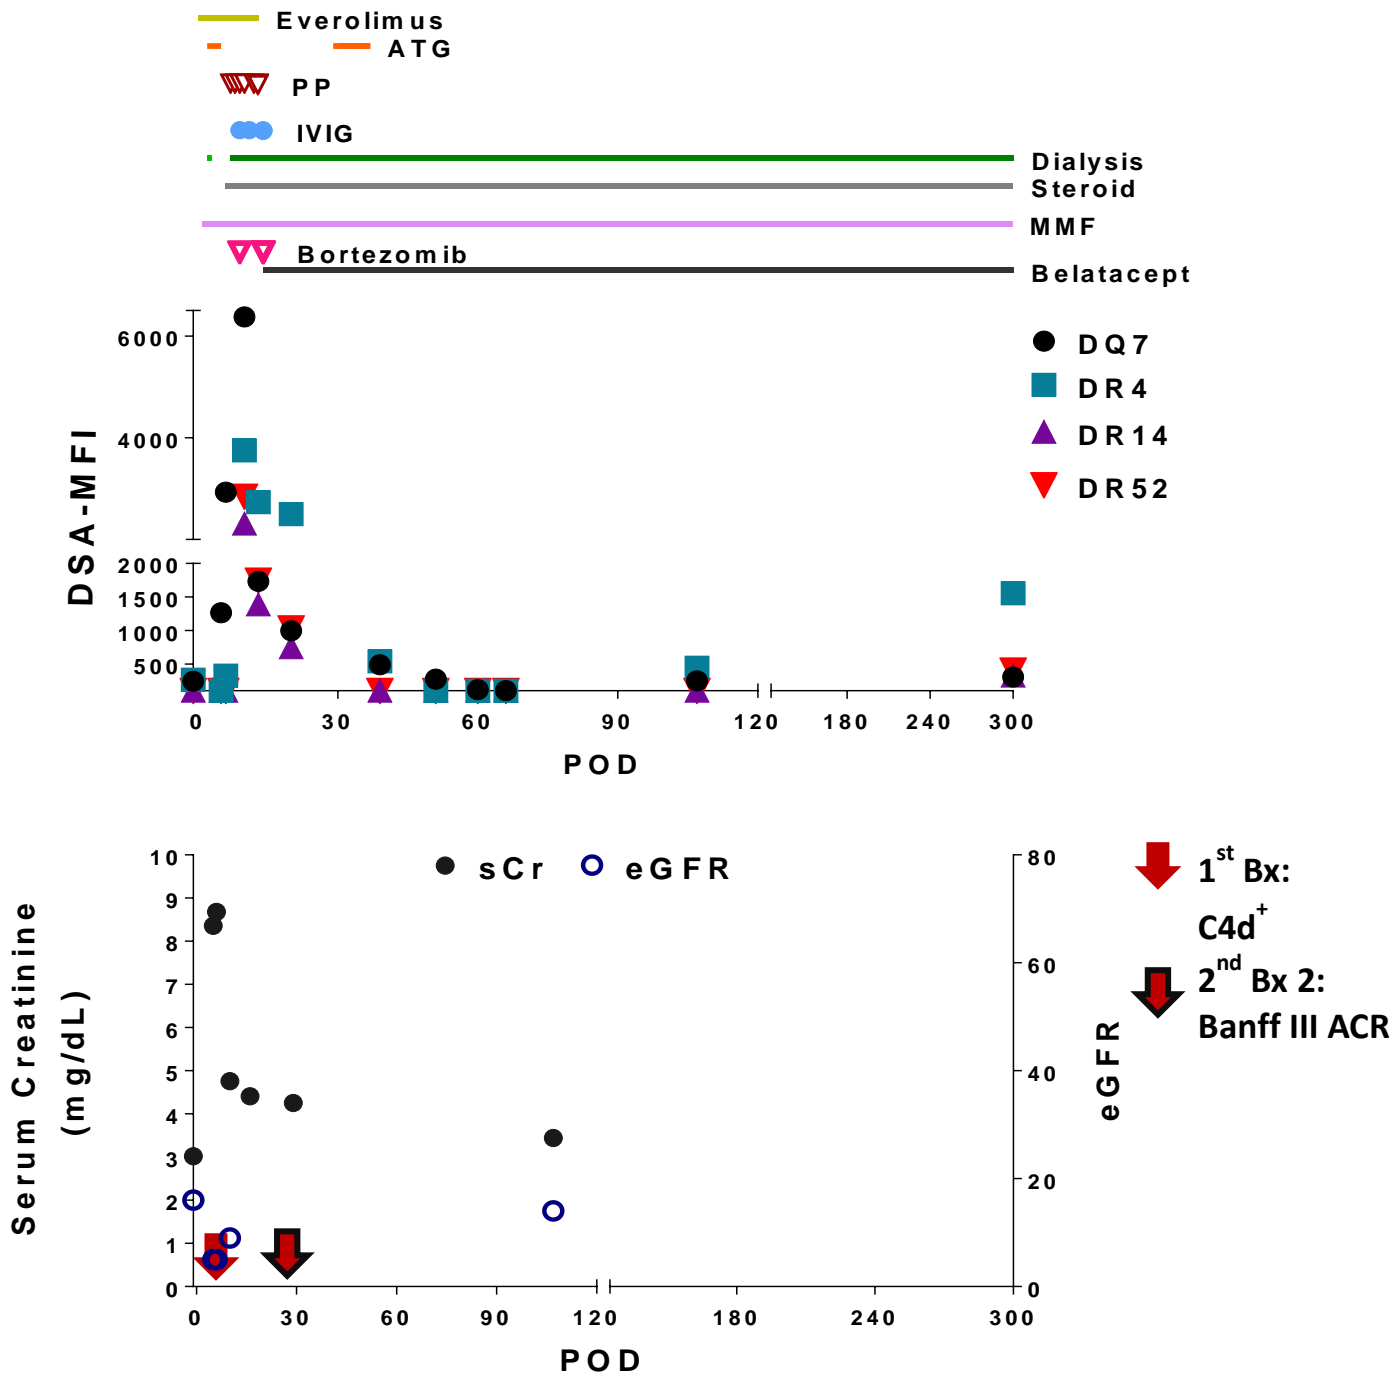

\*Values higher than 60 for eGFR were plotted as 60.

Fig S5-E: Clinical sequelae for Case 6

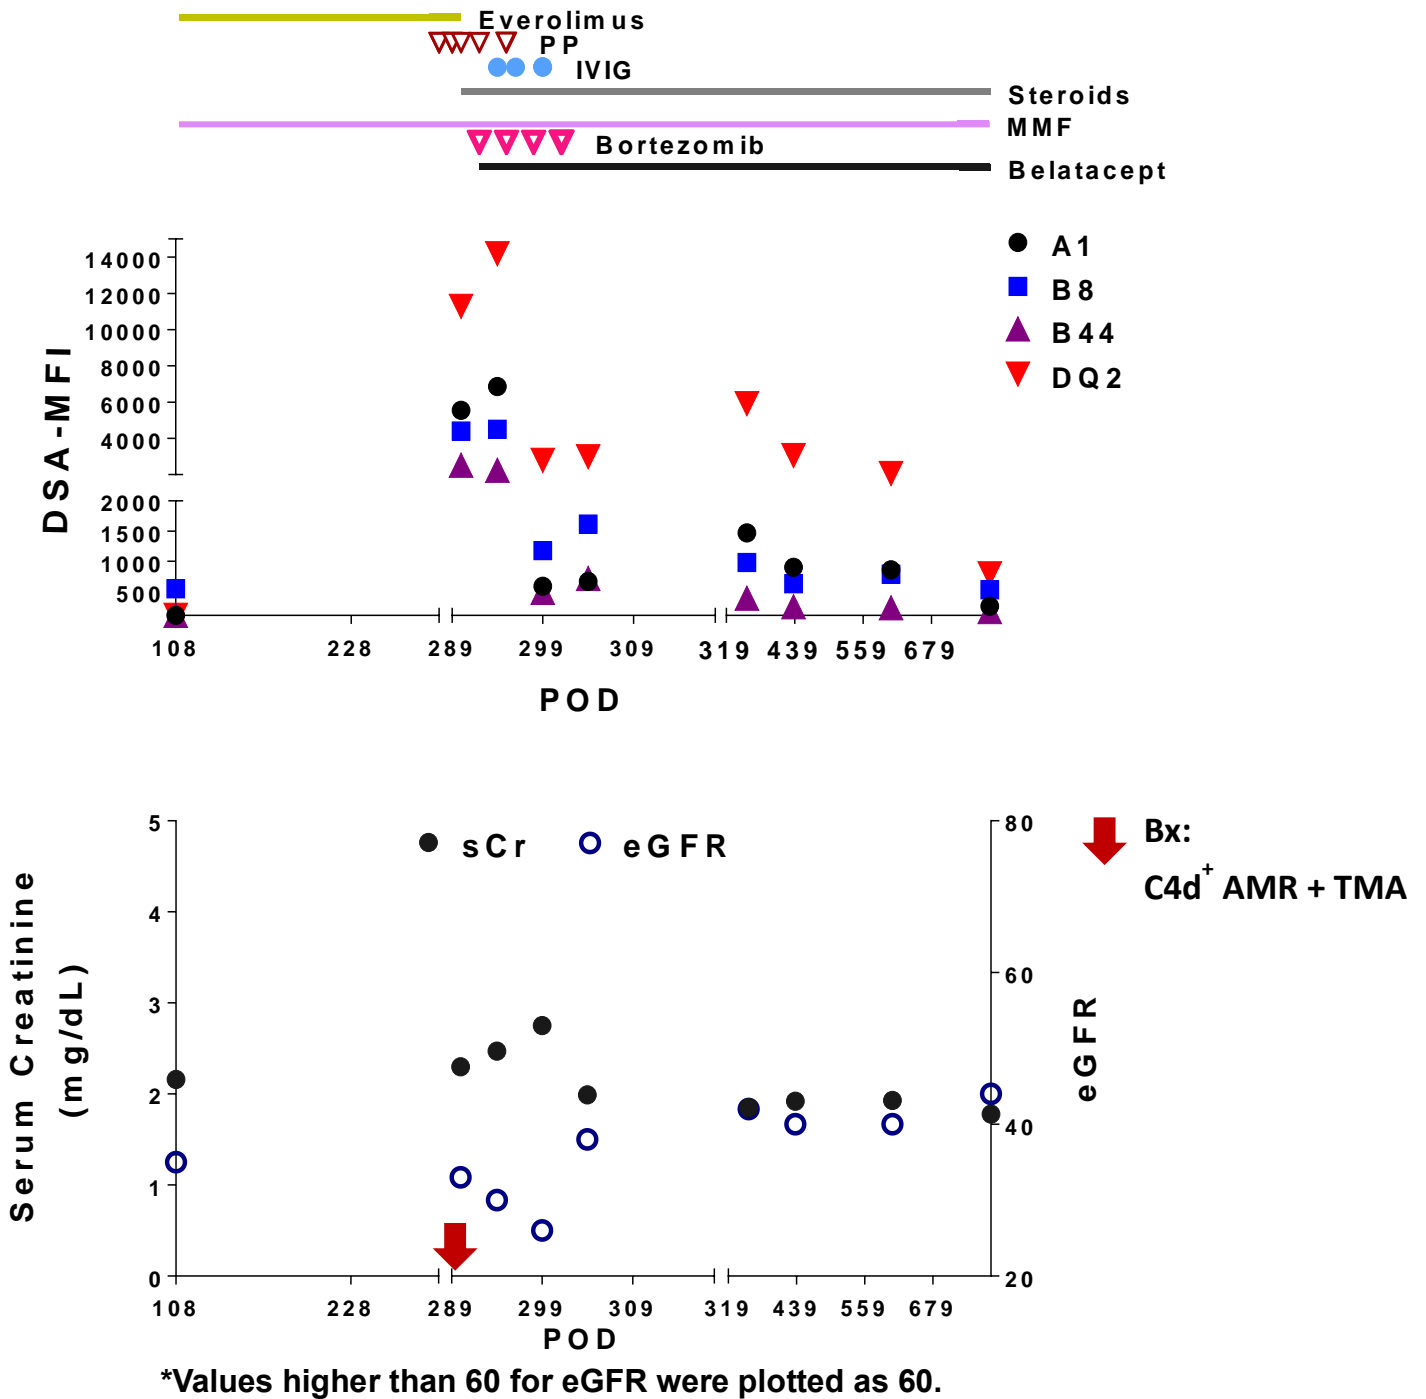

**Fig S6: MFI of DSA is not predictive of time to reach undetectable levels**

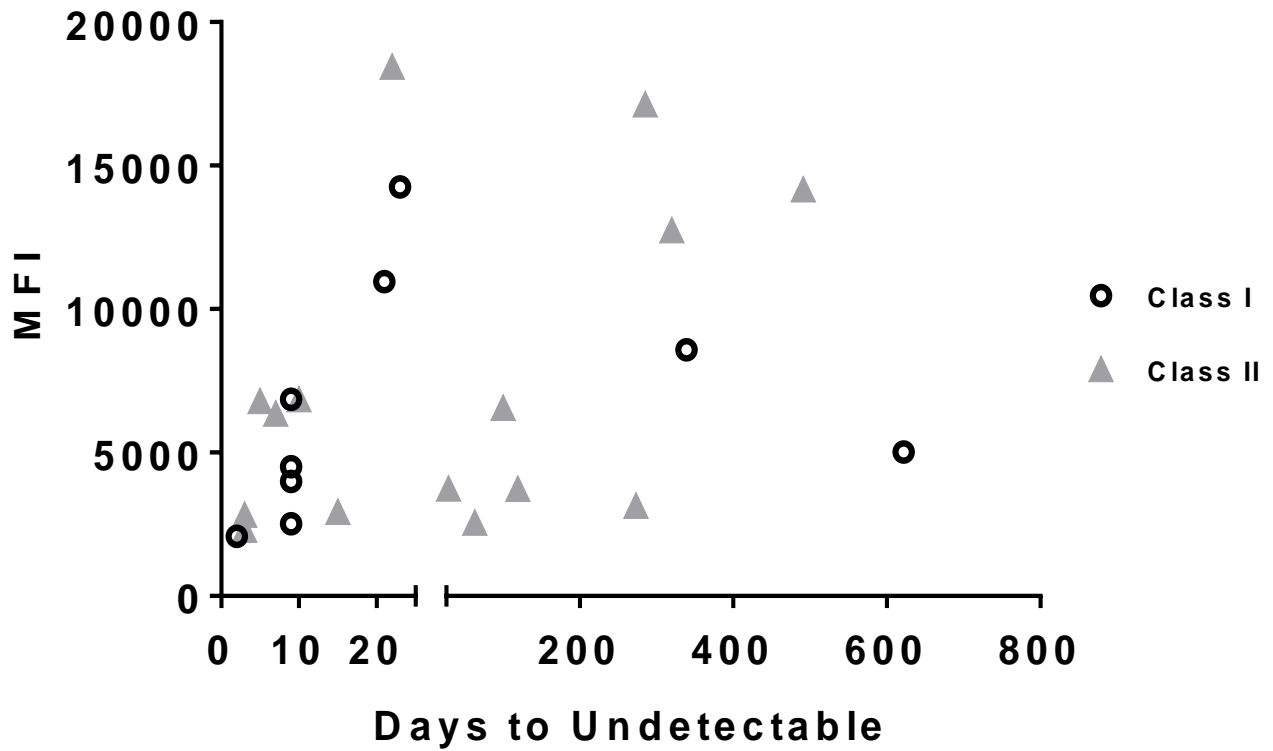

**Figure S6 MFI of DSA is not predictive of time to undetectable.**

MFI of HLA-Class I and Class II donor reactive antibodies for each single HLA antigen specificity were compared to days taken for each antibody to become undetectable from its first appearance. Each single dot represent the serum reactivity towards single HLA antigen and data were pooled from six transplant recipients with AMR.

**Table S1. Characteristics for all biopsies of patients treated with belatacept plus bortezomib (B/B)**

| Patient                      | Days post-transplant | Biopsy Findings |   |     |   |     |     |    |    |     |    |     |     |                 |          |
|------------------------------|----------------------|-----------------|---|-----|---|-----|-----|----|----|-----|----|-----|-----|-----------------|----------|
|                              |                      | t               | v | i   | g | ci  | ct  | cg | mm | cv  | ah | ptc | C4d | other           |          |
| 1                            | 0                    | 0               | 0 | 0   | 0 | 0   | 0   | 0  | 0  | 0   | 0  | 0   | 0   | ND              | Baseline |
| 1                            | 2                    | 0               | 0 | 0   | 1 | 0   | 0   | 0  | 0  | 0   | 0  | 2   | 0   | ATN,TMA         |          |
| 1                            | 12                   | 0               | - | 0   | 1 | 0   | 0   | 0  | 0  | 0   | 0  | 2   | 0   | ATN,TMA         |          |
| 1                            | 20                   | 0               | 1 | 1   | 1 | 0   | 0   | 0  | 0  | 1   | 0  | 2   | 3   | ATN, TMA        |          |
| 1                            | 35                   | 0               | 1 | 0.5 | 1 | 0   | 0   | 0  | 0  | 2   | 0  | 3   | 3   |                 |          |
| 2                            | 0                    | 0               | 0 | 0   | 0 | 0   | 0   | 0  | 0  | 0.5 | 0  | 0   | ND  | Baseline        |          |
| 2                            | 11                   | 3               | - | 2   | 2 | 0   | 0   | 0  | 0  | -   | 0  | 3   | 3   | ATN, IH         |          |
| 2                            | 662                  | 0               | 0 | 0.5 | 1 | 0   | 0   | 1  | 0  | 1   | 0  | 1   | 0   |                 |          |
| 2                            | 871                  | 0               | 0 | 0   | 1 | 0   | 0   | 1  | 0  | 0   | 1  | 0   | 0   |                 |          |
| 3                            | ND                   | -               | - | -   | - | -   | -   | -  | -  | -   | -  | -   | -   | -               |          |
| 4<br>1 <sup>st</sup> episode | 0                    | 0               | 0 | 0   | 0 | 0   | 0   | 0  | 0  | 0   | 1  | 0   | ND  | Baseline        |          |
| 4<br>1 <sup>st</sup> episode | 11                   | 3               | - | 2   | 0 | 0   | 0   | 0  | 0  | -   | 0  | 2   | 3   | ATN             |          |
| 4<br>2 <sup>nd</sup> episode | 82                   | 1               | - | 2   | 0 | 1   | 1   | 0  | 0  | -   | 0  | 0   | 1   | -               |          |
| 5                            | 0                    | 0               | 0 | 0   | 0 | 0   | 0   | 0  | 0  | 0   | 0  | 0   | ND  | Baseline        |          |
| 5                            | 6                    | 0               | 0 | 0   | 0 | 0   | 0   | 0  | 0  | 0   | 0  | 0   | 1   | ATN,IH,Necrosis |          |
| 5                            | 28                   | 1               | 0 | 0.5 | 1 | 1   | 1   | 0  | 0  | 2   | 0  | 3   | 0   | ATN,IH,Necrosis |          |
| 6                            | 0                    | 0               | 0 | 0.5 | 0 | 0.5 | 0.5 | 0  | 0  | 0   | 0  | 0   | ND  |                 |          |
| 6                            | 26                   | 0               | 0 | 0.5 | 0 | 0.5 | 0.5 | 0  | 0  | 0   | 0  | 0   | 0   | ATN             |          |
| 6                            | 291                  | 1               | 0 | 1   | 1 | 1   | 1   | 0  | 0  | 2   | 0  | 2   | 3   | ATN, TMA        |          |

**Table S2. cPRA and DSA for individual patients**

| Patient  | Days Post Tx | cPRA or Class I, Class II PRA | Recipient DSA MFI for Donor HLA |              |             |              |                 |             |             |               | Donor Typing Method/SAB Vendor |
|----------|--------------|-------------------------------|---------------------------------|--------------|-------------|--------------|-----------------|-------------|-------------|---------------|--------------------------------|
|          |              |                               | A                               | B            | C           | DRB1         | DRB3/4/5        | DQB1        | DPB1        | DQA           |                                |
|          |              |                               | 3, 68                           | 37, 62       | 7, 10       | 4, 10        | 53              | 5, 8        | 3, 20       | NA            | SSO/SSP                        |
| <b>1</b> | -1           | 79,37                         | <100,<100                       | <100,<100    | <100,<100   | 190, <100    | <100            | <100,<100   | 1172,       |               | One Lambda                     |
|          | 12           | UNK                           | 148, 1832                       | 6907, 154    | 417, 306    | 214, 208     | 168             | 921, 971    | 12102,      |               | Immucor                        |
|          | 14           | UNK                           | 294, 7206                       | 12044, 407   | 825, 574    | 316, 651     | 234             | 2512, 1902  | 10987,      |               | Immucor                        |
|          | 17           | UNK                           | 255, 10959                      | 14251, 368   | 609, 513    | 447, 1063    | 208             | 6870, 237   | 11775,      |               | Immucor                        |
|          | 19           | UNK                           | 244, 6231                       | 9928, 332    | 562, 480    | 440, 346     | 218             | 2702, 333   | 12992,      |               | Immucor                        |
|          | 24           | UNK                           | 156, 2712                       | 6893, 224    | 409, 699    | 187, 160     | 112             | 1141, 177   | 17144,      |               | Immucor                        |
|          | 28           | UNK                           | 291, 2567                       | 6166, 288    | 517, 548    | 201, 181     | 192             | 557, 184    | 11794,      |               | Immucor                        |
|          | 35           | UNK                           | 160, 491                        | 1550, 187    | 251, 211    | <100,<100    | <100            | 193,<100    | 6352,       |               | Immucor                        |
|          | 45           | UNK                           | <100, 369                       | 1149, 110    | 223, 180    | <100,<100    | <100            | 143,<100    | 3784,       |               | Immucor                        |
|          | 49           | UNK                           | <100, 495                       | 1088,        | 202, 211    | <100,<100    | <100            | 164,<100    | 4825,       |               | Immucor                        |
|          | 66           | UNK                           | 108, 468                        | 1187,        | 227, 226    | 141, <100    | <100            | 323,<100    | 4262,       |               | Immucor                        |
|          | 108          | UNK                           | 112,415                         | 1,099,220    | 221,227     | 185,<100     | <100            | 213,<100    | 2733,       |               | Immucor                        |
|          | 297          | 90                            | <100,<100                       | 257, <100    | <100,<100   | <100,<100    | <100            | 217,<100    | 1052,       |               | One Lambda                     |
|          | 402          | 90                            | <100,<100                       | 317,<100     | <100,<100   | <100,<100    | <100            | <100,<100   | 501,        |               | One Lambda                     |
| 626      | 90           | <100,<100                     | 264,<100                        | <100,<100    | <100,<100   | <100         | 216,<100        | 820,        |             | One Lambda    |                                |
| 902      | 88           | <100,<100                     | <100,<100                       | <100,<100    | <100,<100   | <100         | 397, <100       | 235,        |             | One Lambda    |                                |
| <b>2</b> |              |                               | <b>A</b>                        | <b>B</b>     | <b>C</b>    | <b>DRB1</b>  | <b>DRB3/4/5</b> | <b>DQB1</b> | <b>DPB1</b> | <b>DQA</b>    |                                |
|          |              |                               | <b>3, 11</b>                    | <b>7, 44</b> | <b>4, 7</b> | <b>7, 17</b> | <b>52, 53</b>   | <b>2, -</b> | <b>1, 3</b> | <b>02, 05</b> | <b>SBT/SSO (for DQA)</b>       |
|          | 0            | 98                            | 174, 187                        | <100,<100    | <100,<100   | 101,<100     | 403, 201        | <100,<100   | 132, 121    |               | One Lambda                     |
|          | 11           | 98                            | 2086, <2000                     | <2000,<2000  | <2000,<2000 | <2000,<2000  | <2000,<2000     | <2000,<2000 | 18452, 7920 |               | Immucor                        |
|          | 17           | 98                            | 1619, <2000                     | <2000,<2000  | <2000,<2000 | <2000,<2000  | <2000,<2000     | <2000,<2000 | 3153,<2000  |               | Immucor                        |
|          | 33           | 99                            | <2000,<2000                     | <2000,<2000  | <2000,<2000 | <2000,<2000  | <2000,<2000     | <2000,<2000 | <2000,<2000 |               | Immucor                        |
|          | 59           | 99                            | <2000,<2000                     | <2000,<2000  | <2000,<2000 | <2000,<2000  | <2000,<2000     | <2000,<2000 | <2000,<2000 |               | Immucor                        |
|          | 87           | 98                            | 311, 397                        | 116,<100     | 778, 1432   | <100,<100    | <100,<100       | <100,<100   | 1708, 2993  |               | One Lambda                     |
|          | 171          | 98                            | 299, 144                        | <100,<100    | 949, 1743   | <100,<100    | 707, 122        | <100,<100   | 1576, 3153  |               | One Lambda                     |
|          | 194          | 98                            | 206, <100                       | <100,<100    | 905, 1445   | <100,<100    | 515,<100        | <100,<100   | 1286, 2622  |               | One Lambda                     |
|          | 234          | 98                            | 361, 109                        | <100,<100    | 852, 1541   | <100,<100    | 509, 128        | <100,<100   | 1570, 3024  |               | One Lambda                     |
|          | 269          | 99                            | 298, 115                        | <100,<100    | 1133, 1997  | <100,<100    | 335, 140        | <100,<100   | 1229, 2484  |               | One Lambda                     |
|          | 360          | 99                            | 274, <100                       | <100,<100    | <100,<100   | <100,<100    | 110,<100        | <100,<100   | 819, 1693   |               | One Lambda                     |
|          | 425          | 98                            | 273,<100                        | <100,<100    | <100,<100   | <100,<100    | <100,<100       | <100,<100   | 884, 1771   |               | One Lambda                     |
|          | 486          | 98                            | 190, <100                       | <100,<100    | <100, 127   | <100,<100    | <100,<100       | <100,<100   | 946, 1900   |               | One Lambda                     |
|          | 542          | 99                            | 133,<100                        | <100,<100    | <100, 101   | <100,<100    | 185, <100       | <100,<100   | 1512, 1683  |               | One Lambda                     |
| 662      | 98           | 144,<100                      | <100,<100                       | 152, 154     | <100,<100   | 155, 117     | <100,<100       | 1174, 1259  |             | One Lambda    |                                |
| 812      | 97           | <100,<100                     | <100,<100                       | <100,<100    | <100,<100   | <100,<100    | <100,<100       | 724, 883    |             | One Lambda    |                                |
| 871      | 97           | <100,<100                     | <100,<100                       | <100,<100    | <100,<100   | <100,<100    | <100,<100       | 424, 523    |             | One Lambda    |                                |

|     |        | A          | B          | C          | DRB1       | DRB3/4/5   | DQB1        | DPB1       | DQA        |                |            |
|-----|--------|------------|------------|------------|------------|------------|-------------|------------|------------|----------------|------------|
|     |        | 1, 11      | 8, 51      | 1, 7       | 7, 14      | 52, 53     | 2, 5        | 1, 10      | 01, 02     | SSP            |            |
|     |        | -1         | 35, 0      | 685, <100  | 398, 452   | <100, 109  | <100, <100  | 203, 186   | 137, <100  | <100, <100     |            |
| 25  | 96, 0  | 538, <100  | 3994, 8583 | 1582, 164  | <100, <100 | <100, 395  | 170, <100   | <100, <100 |            | One Lambda     |            |
| 32  | 85, 0  | 241, <100  | 2079, 6072 | 545, <100  | <100, <100 | <100, 153  | <100, <100  | 205, <100  |            | One Lambda     |            |
| 33  | 85, 0  | 115, <100  | 2513, 5223 | 829, 151   | 626, 1177  | 1550, 1252 | 345, 287    | 1147, 1408 |            | One Lambda     |            |
| 35  | 79, 0  | 137, <100  | 1201, 2280 | 258, 108   | 139, 336   | 323, 397   | <100, <100  | 245, 536   |            | One Lambda     |            |
| 42  | 86, 49 | 172, <100  | 1682, 4780 | 839, <100  | 636, 958   | 1310, 1410 | 388, 210    | 769, 1001  |            | One Lambda     |            |
| 58  | 87, 49 | 423, <100  | 1230, 3138 | 2080, 319  | 300, 212   | 464, 2564  | 457, <100   | 366, 319   |            | One Lambda     |            |
| 121 | 93     | 516, <100  | 723, 4849  | 2672, 245  | <100, <100 | <100, 1804 | 376, <100   | <100, <100 |            | One Lambda     |            |
| 219 | 92     | 293, <100  | 828, 4325  | 5015, <100 | <100, <100 | <100, 685  | 600, <100   | <100, <100 |            | One Lambda     |            |
| 364 | 78     | 296, <100  | 277, 1873  | 2837, <100 | <100, <100 | <100, 214  | 155, <100   | <100, <100 |            | One Lambda     |            |
| 378 | 81     | 389, <100  | 312, 2179  | 3895, <100 | <100, <100 | <100, 257  | 408, <100   | <100, <100 |            | One Lambda     |            |
| 680 | 68     | 179, <100  | 182, 1136  | 1382, <100 | <100, <100 | <100, <100 | 307, <100   | <100, <100 |            | One Lambda     |            |
|     |        |            |            |            |            |            |             |            |            |                |            |
|     |        | A          | B          | C          | DRB1       | DRB3/4/5   | DQB1        | DPB1       | DQA        |                |            |
|     |        | 3, 31      | 7, 44      | 7, 16      | 7, 15      | 51, 53     | 2, 6        | 02, -      | 01, 02     | SSOP/DP by SBT |            |
|     |        | -1         | 0          | <100, <100 | <100, 165  | <100, <100 | 343, 116    | 260, 240   | <100, <100 | <100           | One Lambda |
| 12  | 22     | 147, <100  | <100, 184  | <100, <100 | 6803, 258  | 211, 450   | <100, 188   | <100, <100 |            | One Lambda     |            |
| 17  | 0      | 277, <100  | <100, 224  | <100, <100 | 1446, <100 | 164, 649   | <100, <100  | <100, <100 |            | One Lambda     |            |
| 31  | 68     | 1178, 250  | 414, 1367  | <100, <100 | 3334, 584  | 810, 3392  | 10519, 2223 | <100, <100 |            | One Lambda     |            |
| 48  | 50     | 767, 141   | 267, 940   | <100, <100 | 2467, 419  | 775, 3199  | 6506, 2424  | <100, <100 |            | One Lambda     |            |
| 69  | 73     | 1239, 618  | 1142, 1970 | <100, <100 | 2491, 562  | 673, 4553  | 10380, 2137 | <100, <100 |            | One Lambda     |            |
| 82  | 67     | 1082, 296  | 780, 1554  | <100, <100 | 3557, 810  | 991, 6568  | 12756, 2949 | <100, <100 |            | One Lambda     |            |
| 97  | 66     | 875, 239   | 661, 1453  | <100, <100 | 3517, 519  | 718, 5169  | 11534, 1937 | <100, <100 |            | One Lambda     |            |
| 104 | 66     | 728, 102   | 371, 1148  | <100, <100 | 3542, 303  | 408, 4389  | 9269, 1468  | <100, <100 |            | One Lambda     |            |
| 111 | 50     | 607, <100  | 208, 909   | <100, <100 | 2420, 223  | 300, 3423  | 9635, 1165  | <100, <100 |            | One Lambda     |            |
| 117 | 99     | 562, 908   | 644, 828   | <100, <100 | 3744, 1317 | 1234, 2327 | 10995, 1344 | <100, <100 |            | One Lambda     |            |
| 131 | 10     | 141, <100  | <100, 287  | <100, <100 | 861, 158   | 334, 1166  | 4127, 267   | <100, <100 |            | One Lambda     |            |
| 152 | 10     | 159, <100  | 120, 349   | <100, <100 | 1048, 139  | 275, 1206  | 4348, 223   | <100, <100 |            | One Lambda     |            |
| 178 | 10     | <100, <100 | <100, 365  | <100, <100 | 752, <100  | <100, 727  | 3356, 118   | <100, <100 |            | One Lambda     |            |
| 206 | 10     | <100, <100 | <100, 219  | <100, <100 | 1241, <100 | 192, 953   | 3866, 135   | <100, <100 |            | One Lambda     |            |
| 248 | 10     | <100, <100 | <100, 209  | <100, <100 | 1471, 160  | 221, 1000  | 3522, 153   | <100, <100 |            | One Lambda     |            |
| 283 | 10     | <100, <100 | <100, 226  | <100, <100 | 1476, 205  | 215, 896   | 3240, 155   | <100, <100 |            | One Lambda     |            |
| 312 | 10     | <100, <100 | 146, 294   | <100, <100 | 1012, <100 | 113, 523   | 2094, <100  | <100, <100 |            | One Lambda     |            |
| 341 | 0      | <100, <100 | <100, 161  | <100, <100 | 841, <100  | <100, <100 | 1419, <100  | <100, <100 |            | One Lambda     |            |
| 545 | 0      | <100, <100 | <100, 159  | <100, <100 | 640, <100  | <100, 287  | 656, <100   | <100, <100 |            | One Lambda     |            |

| 5 |     |    | A     | B         | C         | DRB1       | DRB3/4/5   | DQB1       | DPB1  | DQA    |            |
|---|-----|----|-------|-----------|-----------|------------|------------|------------|-------|--------|------------|
|   |     |    | 31, - | 38, 44    | 5, 12     | 4, 14      | 52, 53     | 5, 7       | 04, - | 01, 03 | SSO/SSP    |
|   | -1  | 0  | <100  | <100,<100 | <100,<100 | 268,       | <100,<100  | , 240      | 108   |        | One Lambda |
|   | 5   | 0  | <100  | <100,<100 | <100,<100 | <100,<100  | <100,<100  | 975, 1264  | <100  |        | One Lambda |
|   | 6   | 56 | <100  | <100,<100 | <100,<100 | 326, <100  | <100,<100  | 1993, 2929 | <100  |        | One Lambda |
|   | 10  | 56 | 148   | <100, 565 | 851, 722  | 3751, 2314 | 2847, 1588 | 1910, 6373 | 1361  |        | One Lambda |
|   | 13  | 0  | 118   | 123, 647  | 475, 330  | 2733, 1391 | 1749, 948  | 428, 1735  | 777   |        | One Lambda |
|   | 20  | 0  | <100  | <100, 133 | 130, 139  | 2495, 749  | 1037, 713  | 262, 996   | 661   |        | One Lambda |
|   | 39  | 0  | <100  | 123, 140  | <100, 129 | 540, <100  | <100,<100  | 186, 489   | 110   |        | One Lambda |
|   | 51  | 0  | <100  | <100,<100 | <100,<100 | <100,<100  | <100,<100  | <100, 275  | <100  |        | One Lambda |
|   | 60  | 0  | <100  | <100,<100 | <100,<100 | <100,<100  | <100,<100  | <100, 117  | <100  |        | One Lambda |
|   | 66  | 0  | <100  | <100,<100 | <100,<100 | <100,<100  | <100,<100  | <100,<100  | <100  |        | One Lambda |
|   | 107 | 0  | <100  | <100,<100 | <100,<100 | 445,<100   | <100,<100  | <100, 250  | <100  |        | One Lambda |
|   | 300 | 56 | <100  | <100,<100 | <100,<100 | 1556, 327  | 405,<100   | 583, 3005  | <100  |        | One Lambda |

| 6 |     |    | A    | B          | C         | DRB1      | DRB3/4/5 | DQB1        | DPB1      | DQA       |                   |
|---|-----|----|------|------------|-----------|-----------|----------|-------------|-----------|-----------|-------------------|
|   |     |    | 1, - | 8, 44      | 5,7       | 13,17     | 52       | 2,6         | 04, 19    | 01, 05:01 | SSP/SSO (for DQA) |
|   | -1  | 0  | <100 | 544,       | <100,<100 | <100,<100 | <100     | <100,0      | <100,<100 |           | One Lambda        |
|   | 290 | 81 | 5548 | 4411, 2519 | <100,<100 | <100,<100 | <100     | 11281, <100 | <100,<100 |           | One Lambda        |
|   | 294 | 81 | 6861 | 4505, 2250 | <100,<100 | <100,<100 | <100     | 14178, <100 | <100,<100 |           | One Lambda        |
|   | 299 | 10 | 583  | 1177, 485  | <100,<100 | <100,<100 | <100     | 2792, <100  | <100,<100 |           | One Lambda        |
|   | 304 | 10 | 665  | 1,617,716  | <100,<100 | <100,<100 | <100     | 2990, <100  | <100,<100 |           | One Lambda        |
|   | 355 | 10 | 1471 | 978, 386   | <100,<100 | <100,<100 | <100     | 5914, <100  | <100,<100 |           | One Lambda        |
|   | 437 | 10 | 901  | 625, 244   | <100,<100 | <100,<100 | <100     | 3053, <100  | <100,<100 |           | One Lambda        |
|   | 608 | 10 | 856  | 787, 230   | <100,<100 | <100,<100 | <100     | 2060, <100  | <100,<100 |           | One Lambda        |
|   | 781 | 0  | 252  | 526, 164   | <100,<100 | <100,<100 | <100     | 790, <100   | <100,<100 |           | One Lambda        |

**Table S3. Changes in sCr and eGFR in patients treated with belatacept plus bortezomib (B/B)**

| Patient | Start | Last F/u | <sup>a</sup> ΔsCr ( <sup>b</sup> eGFR) |                  |                |
|---------|-------|----------|----------------------------------------|------------------|----------------|
|         |       |          | Start->Best                            | Start->Last F/u  | Best->Last F/u |
| 1       | 21 d  | 30 m     | -4.9(10.1)                             | -4.9(10.1)       | 0(1)           |
| 2       | 14 d  | 29 m     | -2.35(4.1)                             | -1.84(2.9)       | 0.51(0.7)      |
| 3       | 32 d  | 22 m     | -1.7(2.7)                              | -1.3(2.3)        | 0.4(0.9)       |
| 4       | 17 d  | 115 d    | -0.79(2.2)                             | NA               | NA             |
|         | 115 d | 18 m     | -0.1(1.2)                              | 0(1.0)           | 0(0.8)         |
| 5       | 9 d   | 10 m     | -5.26(2.8)                             | <sup>c</sup> HDD | HDD            |
| 6       | 292 d | 26 m     | -0.5(2.0)                              | 0.5(1.3)         | 0(0.7)         |

<sup>a</sup>ΔsCr is the difference in sCr and <sup>b</sup>ΔeGFR is the fold change in eGFR from B/B start to best or last follow-up (F/u). <sup>c</sup>HDD: Hemodialysis.



## Materials and Methods

*Mice, immunization and immunosuppression:* Female C57BL/6 (B6, H-2b), BALB/c (B/c, H-2d) mice, were purchased from Harlan Sprague Dawley Inc. (Indianapolis, IN), and received immunization with BALB/c splenocytes (DST;  $25 \times 10^6$ /mouse s.c. and i.p.). Full-thickness BALB/c skin were grafted onto the flank of recipient C57BL/6 mice. Mice were treated with Bortezomib (0.75-1mg/Kg, i.p.) (VELCADE, Millennium Pharmaceuticals, Inc) and/or CTLA4-Ig (25mg/kg; i.p.) (ORENCIA, abatacept, Bristol-Myers Squibb) followed by a 2x/week dosing of CTLA4-Ig (12.5mg/kg).

*Flow cytometric analysis of PC subsets in mice:* Spleen, femurs and tibiae were harvested, and erythrocytes were lysed (ACK lysing buffer, Quality Biological Inc.). Cells ( $5 \times 10^6$ ) were suspended in 2%FBS and stained for PC subset analysis, as described previously<sup>18</sup>. A further gating was done on mature PC to analyze the long lived plasma cells (LLPCs: CD20-, CD19-, CD27-, CD38+, and CD138+). Data were acquired using a LSRFortessa™ flow cytometer (BD) and analyzed using FlowJo (FlowJo, LLC, Ashland OR).

*Mouse DSA quantification:* DSA were quantified using  $1 \times 10^6$  BALB/c splenocytes, stained with 2 $\mu$ L of test serum and anti-IgG secondary antibodies. Mean fluorescence intensity (MFI) of anti-IgG were from non-CD19<sup>+</sup> B cells. The normalized MFI was calculated considering the baseline MFI at day zero to be one hundred percent for each individual mouse.

*Antibodies for mouse PC subset and DSA analysis:* The following antibodies were used: anti-CD138-PE (281-2, Cat#142503, Biolegend), anti-TACI-APC (ebio8F10-3, Cat#17594281, eBioscience), anti-CD45R (B220)-PerCP-Cy5.5 (RA3-6B2, Cat#45045280, eBioscience), anti-CD19 Alexa Fluor 488 (6D5, Cat#115524, Biolegend), anti-CD38 APC-Cy7 (90, Cat#102727, Biolegend), anti-CD20 PE-Cy7 (SA275A11, Cat#150419, Biolegend), anti-CD27 BV510 (LG.3A10, Cat#563605, BD biosciences), anti CD19-APC (1D3, Cat#550992, BD biosciences), anti-IgG (H+L)-FITC (Cat#1031-02, Southern Biotech). Anti-CD3-eFluor450 (17A2,

Cat#48003282, eBioscience). LIVE/DEAD™ fixable violet dead cell stain kit (Invitrogen, Carlsbad, CA) and Fc block 2.4G2 (unconjugated CD16/CD32) were used.

*Mouse IgG ELISpot:* Total IgG and Anti K<sup>d</sup>-IgG secreting cell were analyzed using a Mouse IgG ELISpot<sup>BASIC</sup> HRP, Mabtech AB, Sweden). Briefly, cells were added to ELISpot plates (MultiScreen™, EMD Millipore, Burlington, MA) pre-coated with anti-IgG. Biotinylated K<sup>d</sup> monomer (NIH, Tetramer core facility, Atlanta, GA) or anti-IgG were then added, followed by Streptavidin-HRP and TMB. Plates were analysed using CTL ImmunoSpot analyser (Cellular Technology Limited, Cleveland, OH).

*Statistical analysis:* The statistical significance of differences in mean values and cell numbers were analyzed by Student's *t* test, one way ANOVA using Graphpad Prism 7 (Graphpad, San Diego, CA). P values ≤0.05 were considered statistically significant.

*Patients:* A sequential series of 6 ABO-compatible renal kidney recipients transplanted between 9/2015 and 9/2016 that developed nascent AMR following renal transplantation were treated with bortezomib plus belatacept. Patient demographics and transplant characteristics are summarized in Table 1. All patients had a negative T and B cell flow cytometric cross-match with no discernable DSA in immediately pre-transplant sera by Luminex single antigen bead analyses (LABScreen Single Antigen, One Lambda, Canoga Park, CA and Immucor Inc. Peachtree Corners, GA). Five recipients received thymoglobulin induction, with one patient receiving basiliximab due to a history of ATG allergy. All 6 acute AMR episodes were treated with steroids and PP, and IVIG prior to initiating bortezomib and belatacept. Maintenance immunosuppression prior to AMR consisted of everolimus and microemulsion cyclosporine with steroid discontinuation after a rapid 5 day taper.

*AMR treatment:* Bortezomib was dosed at 1.3 mg/m<sup>2</sup>/dose. Belatacept was dosed at 10 mg/kg on day 1, 5, weeks 2, 4, and 12 then 5 mg/kg monthly. The IVIG, was dosed at 1 gm/kg/dose (Privagen, CSL Behring,

King of Prussia, PA). All 6 acute AMR episodes were treated with steroids and PP prior to initiating bortezomib and belatacept, plus IVIG after PP in 3/6 cases. One patient was treated with ATG due to the presence of mixed acute cellular and antibody mediated rejection prior to bortezomib and belatacept therapy.

*Qualitative Anti-HLA Antibody Screening and DSA identification:* Solid-phase multiplex testing (FLOWPRA) was performed according to the manufacturer's recommendations (One Lambda, Canoga Park, CA). Bound antibody was detected with a PE-conjugated anti-human IgG using a Coulter Epics2 flow cytometer. A negative serum control was used to establish background cut-offs and a serum was considered positive if the MFI was 6% above the cut-off and exhibited peak architecture consistent with alloantibody binding. Sera which screened positive were then tested for Class I or Class II DSA using single antigen beads. The identification of DSA specificities were determined on a Luminex 100 reader, and MFI values above 2,000 were considered indicative of DSA presence (Table S2).

*Biopsies:* C4d staining was performed using indirect immunofluorescence (on frozen sections) using Quidel anti-C4d monoclonal antibody (Quidel Corporation, cat no. A213) (1:40 dilution) and FITC- goat anti-mouse IgG (Beckman Coulter, Marseille, France, cat no. PN IM0819) (1:50 dilution). Biopsies were scored using the Banff 2015 criteria by a single pathologist (TN at Ohio State University Hospitals). The Banff scoring of the indication biopsies used to confirm AMR are included in Table 2 and S3.

*Estimated glomerular filtration rate (eGFR):* The eGFR was calculated using the MDRD formula adjusted for patient height and weight.
